# Supplementary material for: Phenome-wide association analysis of substance use disorders in a deeply phenotyped sample
Source: bioRxiv or medRxiv preprint supplement (doi:10.1101/2022.02.09.22270737), 2022-02-10

Supplementary Figure 1

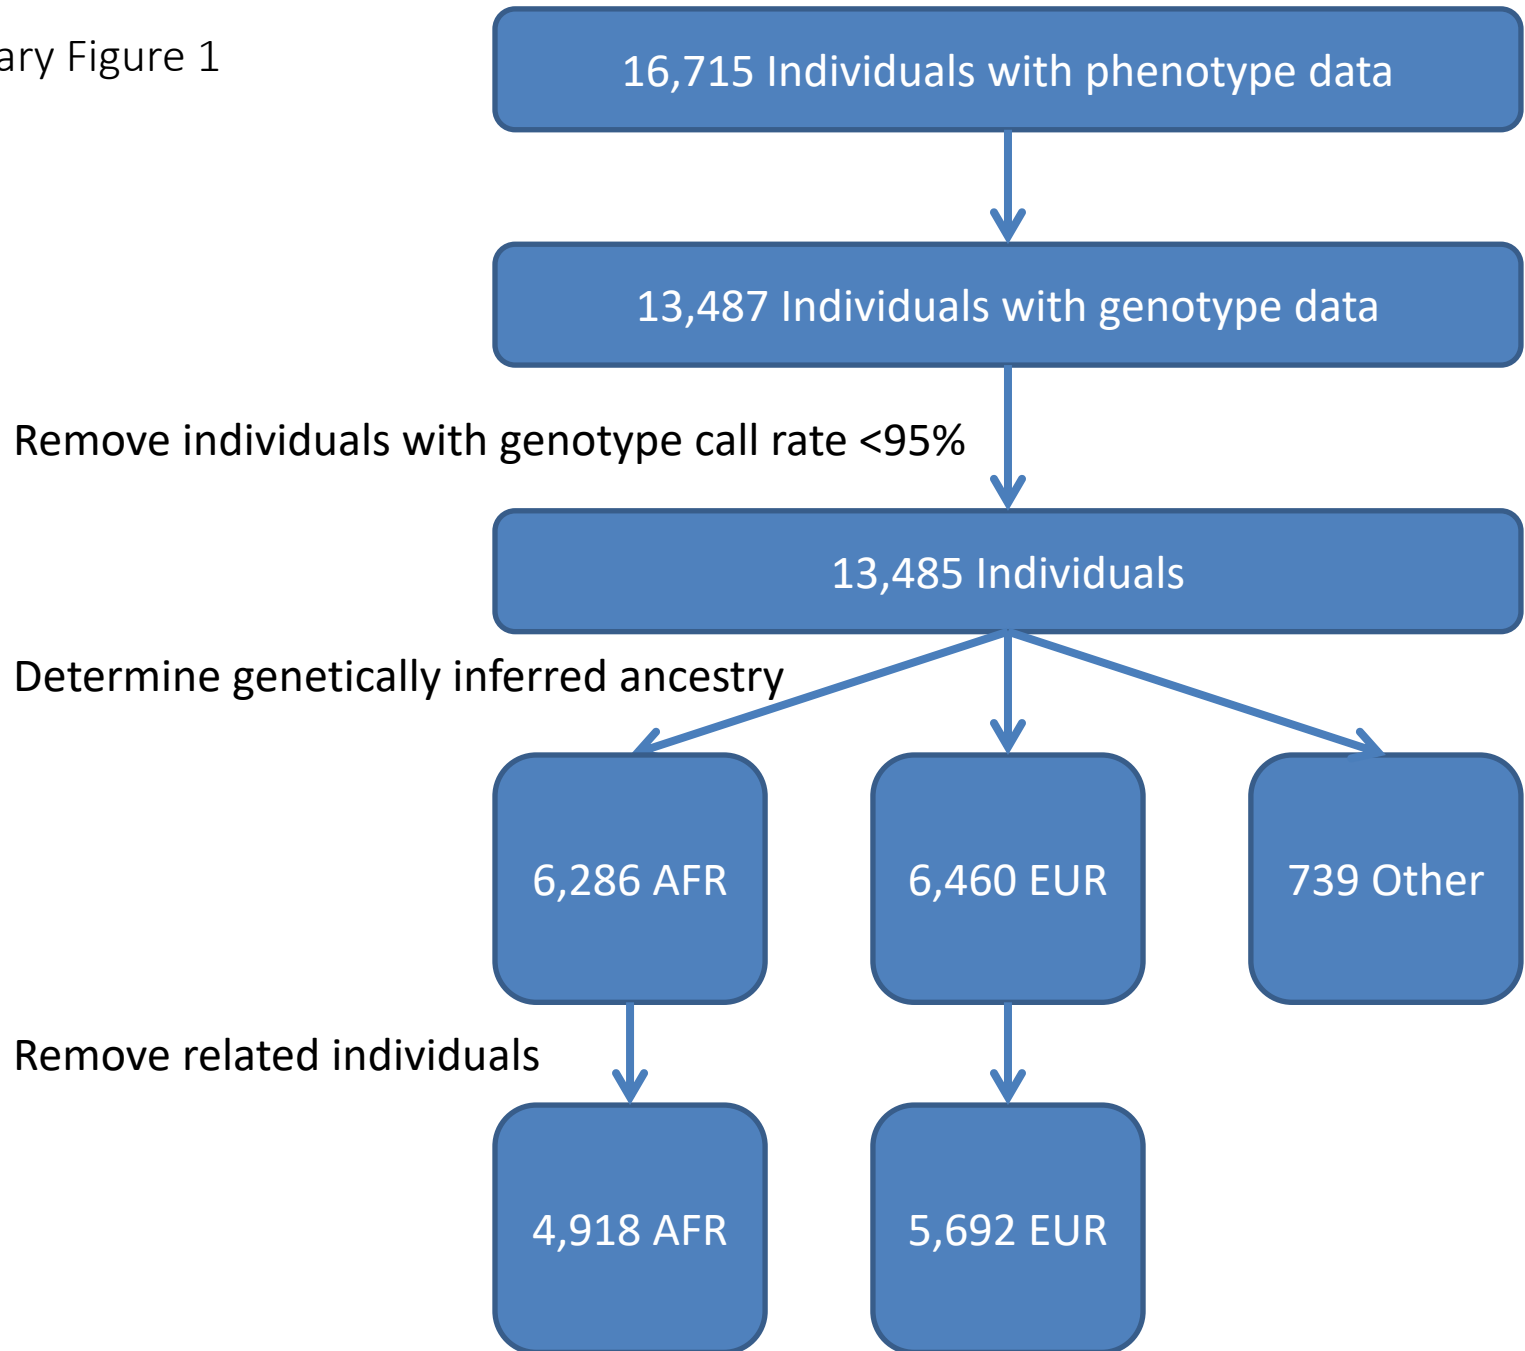

Supplement: Supplementary file [file media-3.pdf]
